# Supplementary material for: Production of a New Cyclic Depsipeptide by the Culture Broth of Staphylococcus sp. Isolated from Corallina officinalis L
Source: MDPI journal article supplement (doi:10.3390/metabo9110273), 2019-11-11
Supplement: s1 [file s1]

# Production of A New Cyclic Depsipeptide by the Culture Broth of *Staphylococcus* sp. Isolated from *Corallina officinalis* L.

Reda F. A. Abdelhameed <sup>1</sup>, Sameh S. Elhady <sup>2,3</sup>, Ahmad O. Noor <sup>4</sup>, Diena M. Almasri <sup>4</sup>, Alaa A. Bagalagel <sup>4</sup>, Galal T. Maatooq <sup>5,6</sup>, Amgad I. M. Khedr <sup>3</sup> and Koji Yamada <sup>7,\*</sup>

## Additional Experimental Detail.

- 1) **Figure S1.** Elemental composition of compound **1**
- 2) **Figure S2.** FABMS spectrum of compound **1**
- 3) **Figure S3.** FABMS fragments of compound **1**
- 4) **Figure S4.** <sup>1</sup>H-NMR spectrum of compound **1** (pyridine-d<sub>5</sub>)
- 5) **Figure S4-a.** <sup>1</sup>H-NMR spectrum of compound **1** with identified signals
- 6) **Figure S5.** <sup>13</sup>C-NMR spectrum of compound **1** (pyridine-d<sub>5</sub>)
- 7) **Figure S6.** HSQC spectrum of compound **1** (pyridine-d<sub>5</sub>)
- 8) **Figure S7.** HMBC spectrum of compound **1** (pyridine-d<sub>5</sub>)
- 9) **Figure S7a-S7-b.** HMBC spectrum expansions of compound **1** (pyridine-d<sub>5</sub>)
- 10) **Figure S8.** <sup>1</sup>H-<sup>1</sup>H COSY correlations of compound **1** (pyridine-d<sub>5</sub>)
- 11) **Figure S8-a.** <sup>1</sup>H-<sup>1</sup>H COSY spectrum of compound **1** with identified correlations
- 12) **Figure S9.** NOESY correlations of compound **1** (pyridine-d<sub>5</sub>)
- 13) **Figure S9-a.** NOESY spectrum of compound **1** with identified correlations

| [ Elemental Composition ] |               |                 |        |                       | Page: 1           |
|---------------------------|---------------|-----------------|--------|-----------------------|-------------------|
| Data :                    | DHFA2493      |                 |        | Date :                | 06-Mar-2013 14:10 |
| Sample:                   | Mansour       | No.A-20-1-2-2   |        |                       |                   |
| Note :                    | No.2          | Pyridine        | +      | M.B                   | + NaCl            |
| Inlet :                   | Direct        |                 |        | Ion Mode :            | FAB+              |
| RT :                      | 0.67 min      |                 |        | Scan#:                | (6,7)             |
| Elements :                | C 49/0,       | H 90/0,         | N 9/0, | O 12/0,               | Na 1/0            |
| Mass Tolerance            | : 10mmu       |                 |        |                       |                   |
| Unsaturation (U.S.)       | : -5.0 - 60.0 |                 |        |                       |                   |
| Observed m/z              | Int%          | Err [ppm / mmu] | U.S.   | Composition           |                   |
| 1017.6417                 | 9.1           | -3.2 / -3.3     | 10.0   | C 49 H 88 N 9 O 12 Na |                   |
| 1016.6396                 | 14.1          | +2.4 / +2.5     | 10.5   | C 49 H 87 N 9 O 12 Na |                   |

**Figure S1.** Elemental composition of compound **1**

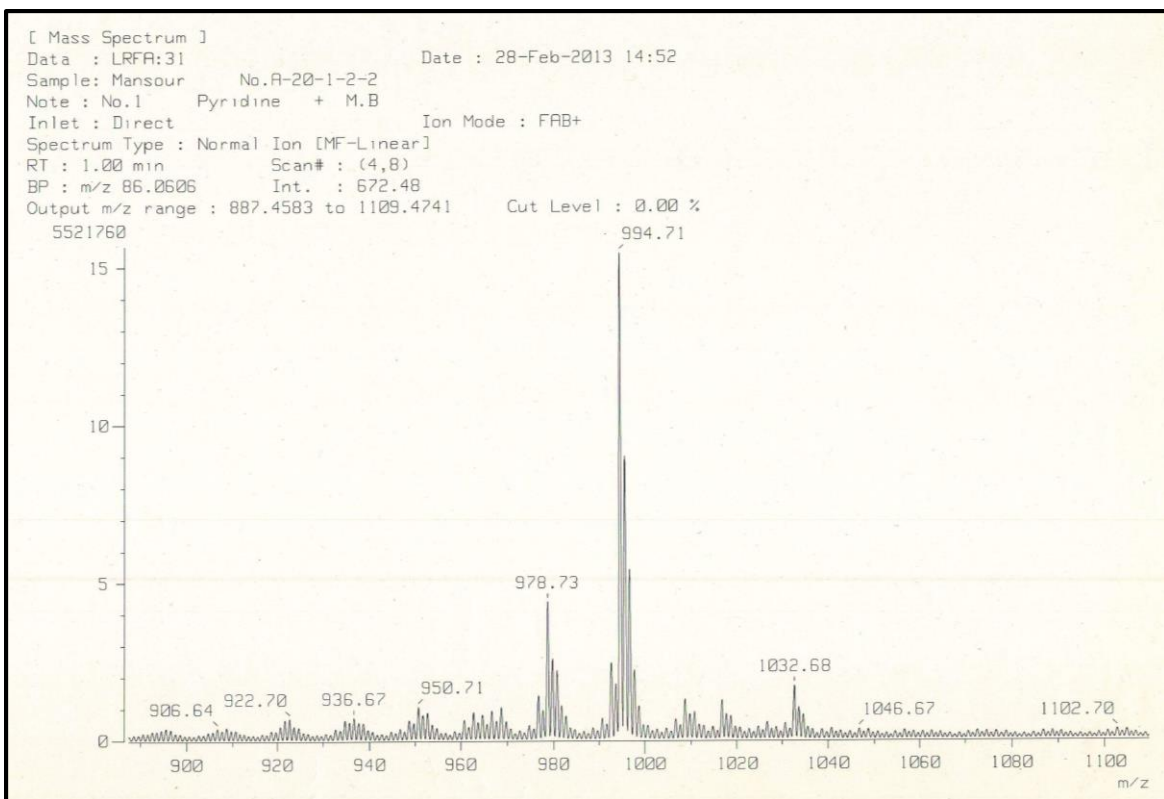

Figure S2. FABMS spectrum of compound 1

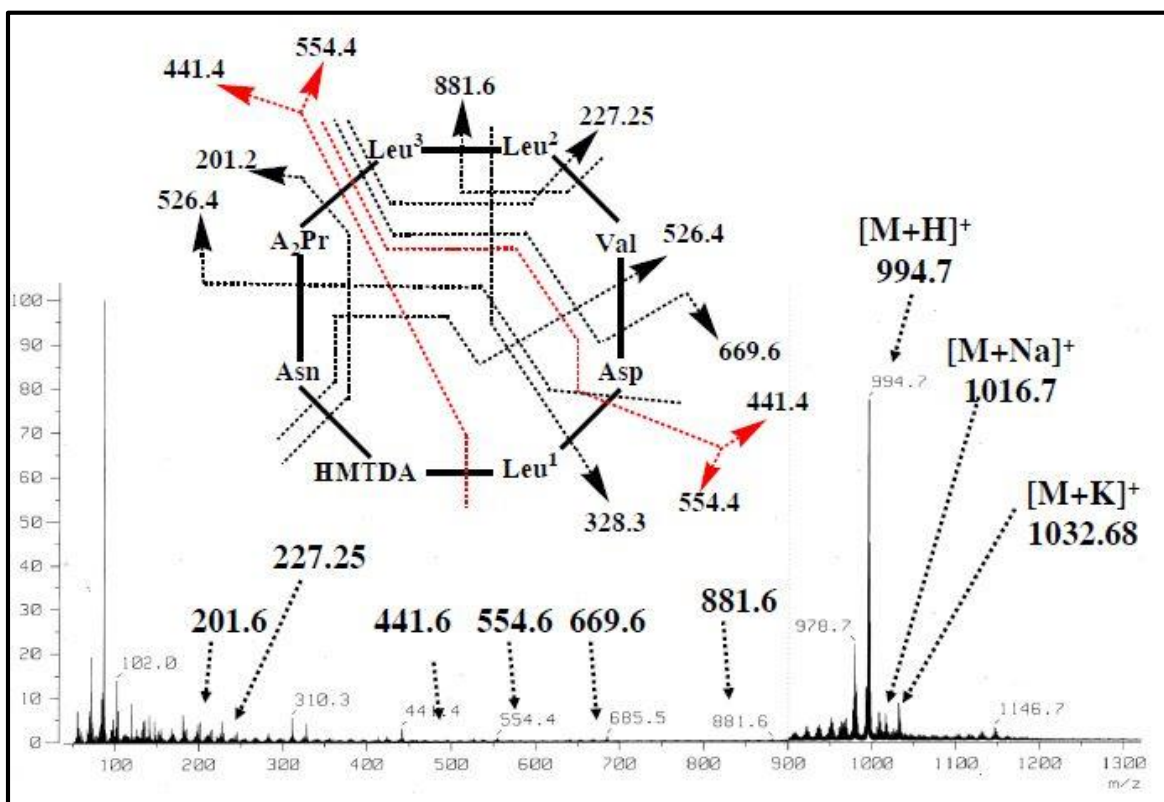

Figure S3. FABMS fragments of compound 1

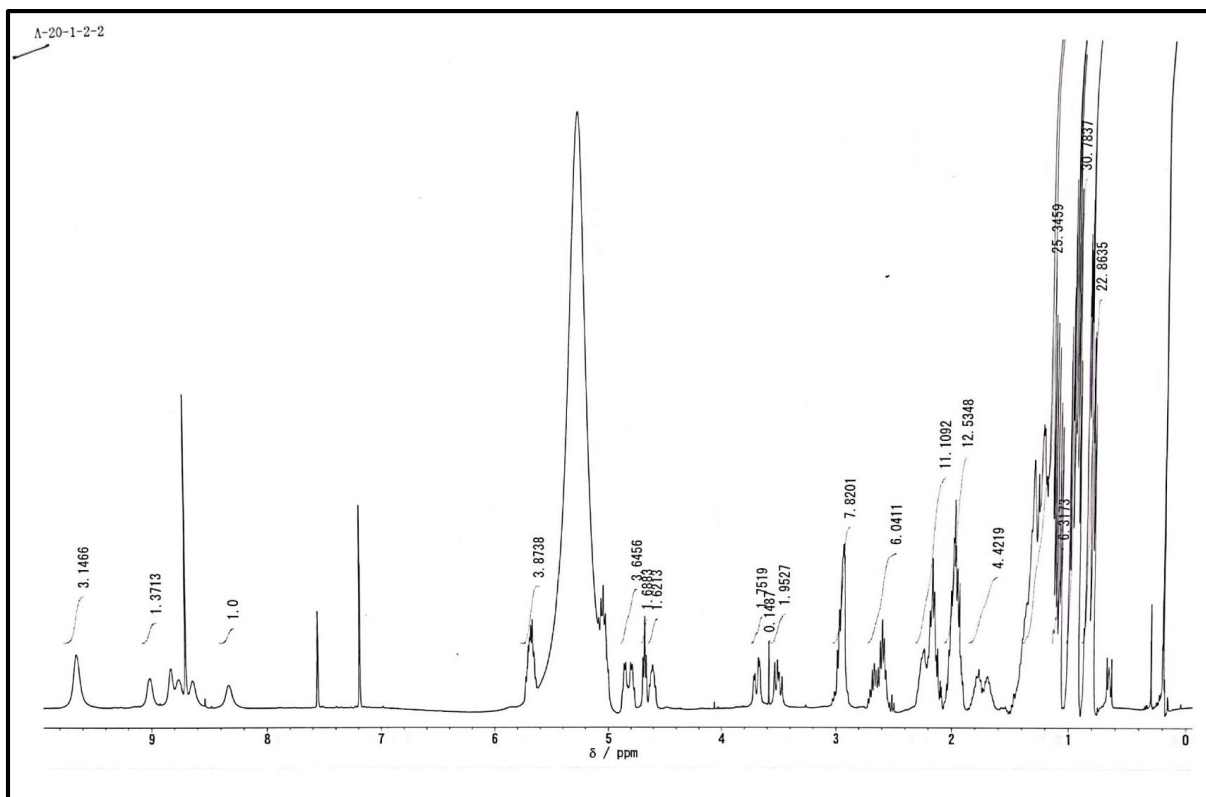

Figure S4.  $^1\text{H-NMR}$  spectrum of compound 1 (pyridine- $\text{d}_5$ )

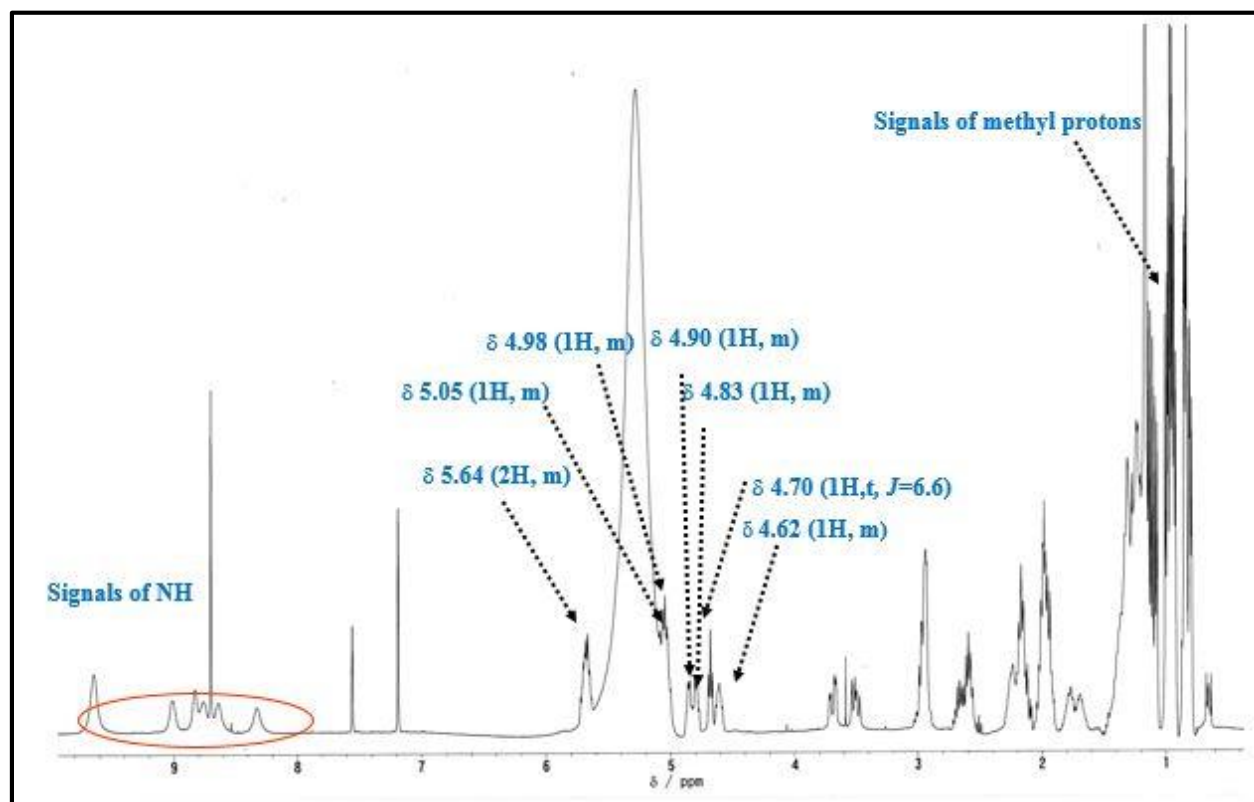

Figure S4-a.  $^1\text{H-NMR}$  spectrum of compound 1 with identified signals

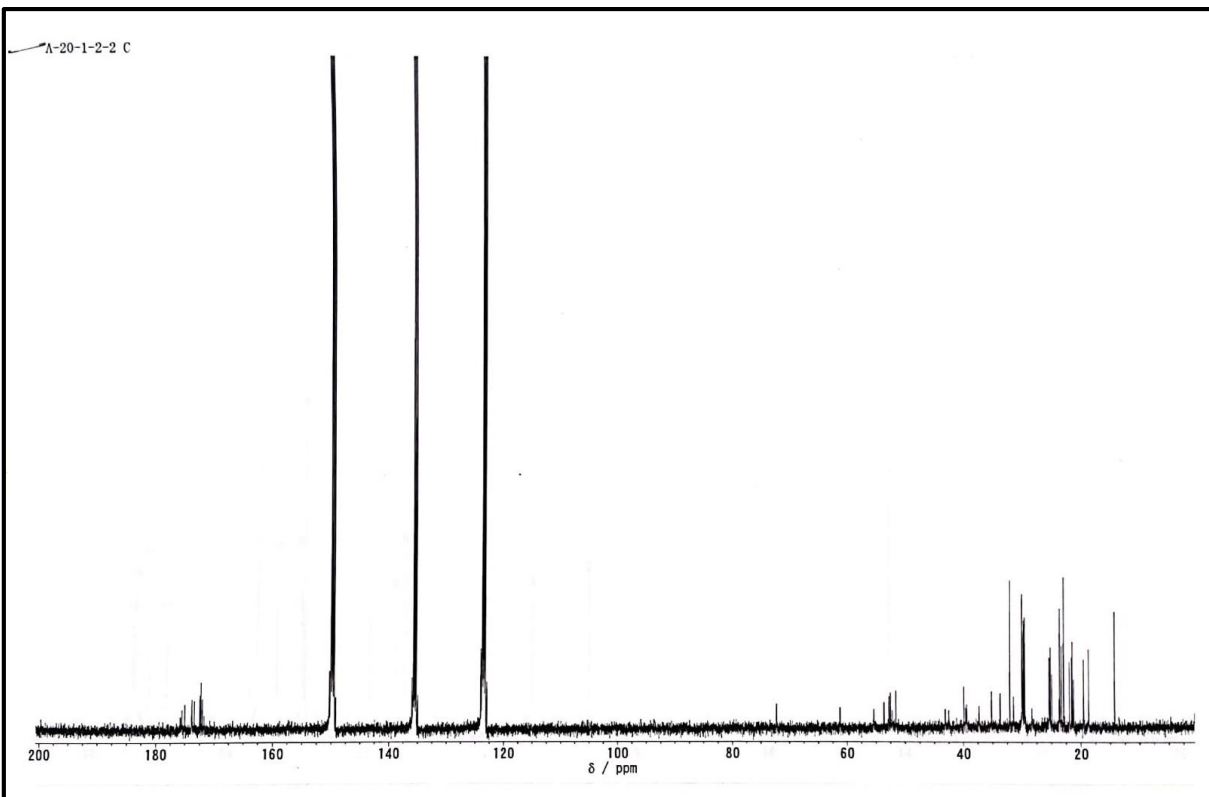

**Figure S5.**  $^{13}\text{C}$ -NMR spectrum of compound **1** (pyridine- $\text{d}_5$ )

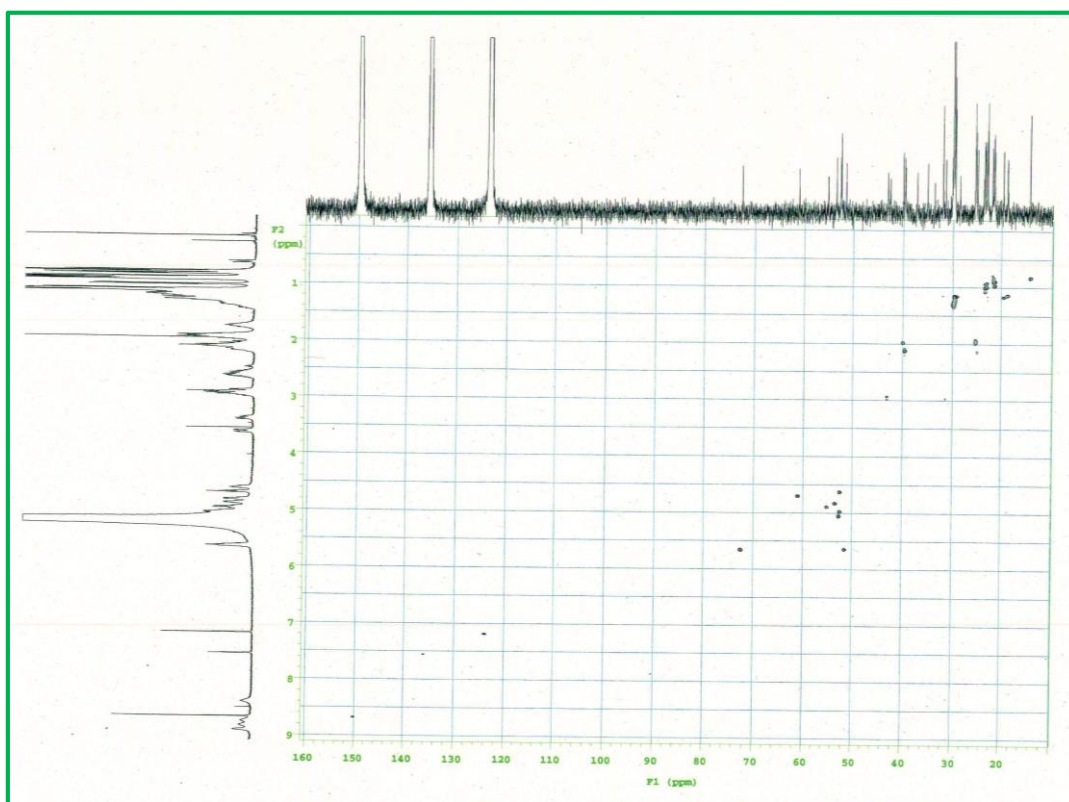

**Figure S6.** HSQC spectrum of compound **1** (pyridine- $\text{d}_5$ )

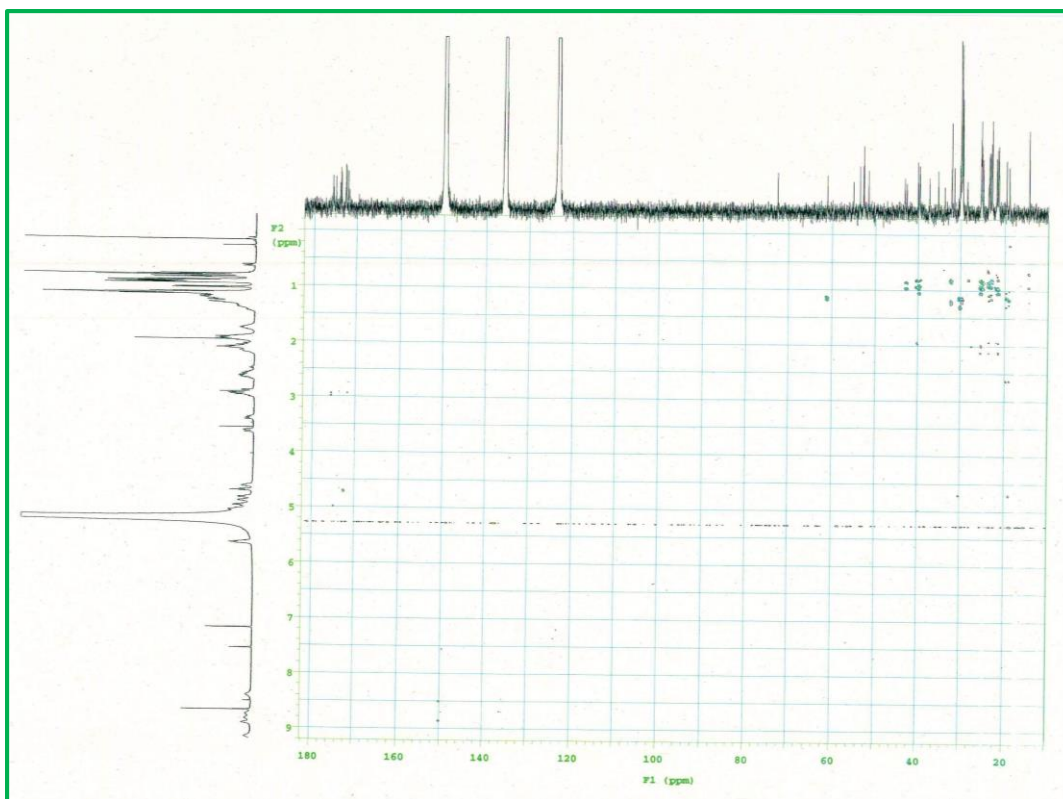

**Figure S7.** HMBC spectrum of compound **1** (pyridine-d<sub>5</sub>)

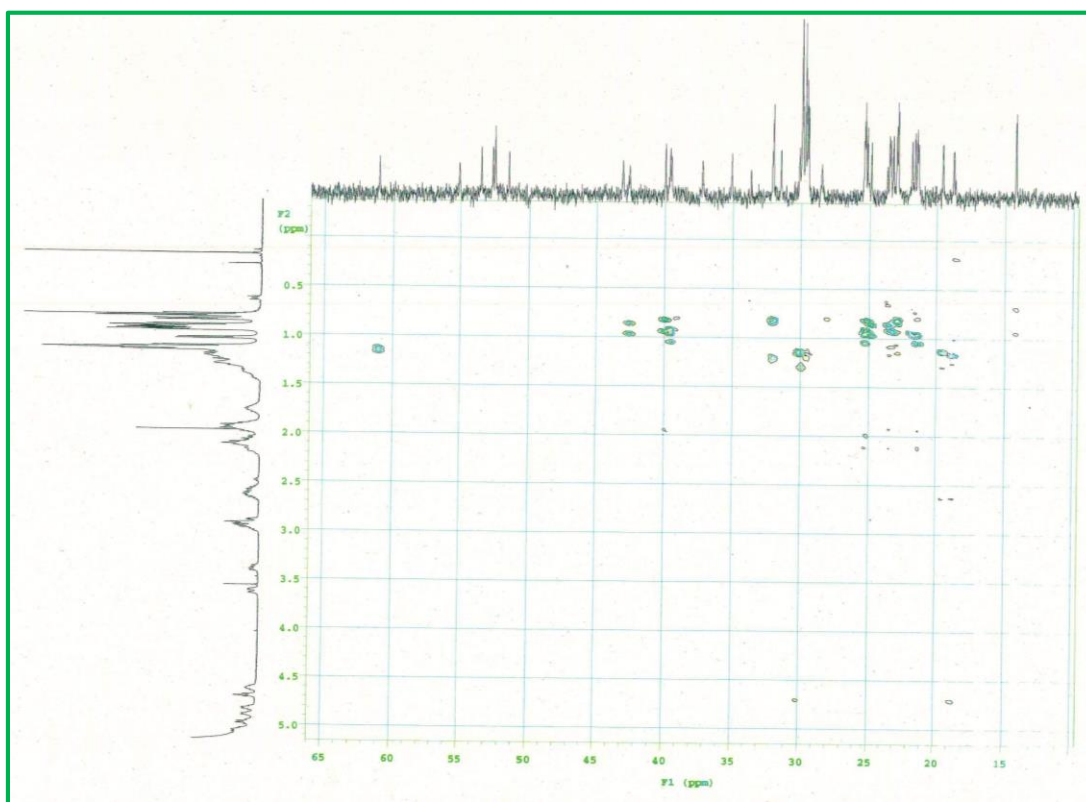

**Figure S7-a.** HMBC spectrum expansions of compound **1** (pyridine-d<sub>5</sub>)

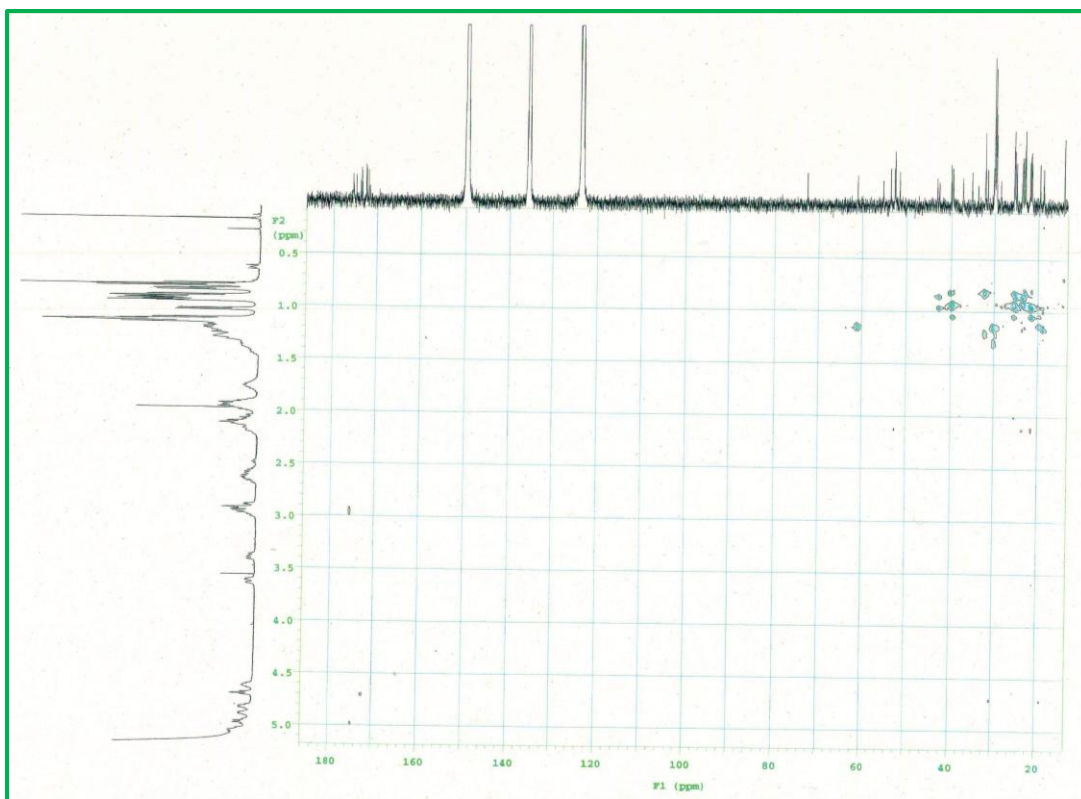

**Figure S7-b.** HMBC spectrum expansions of compound **1** (pyridine-d<sub>5</sub>)

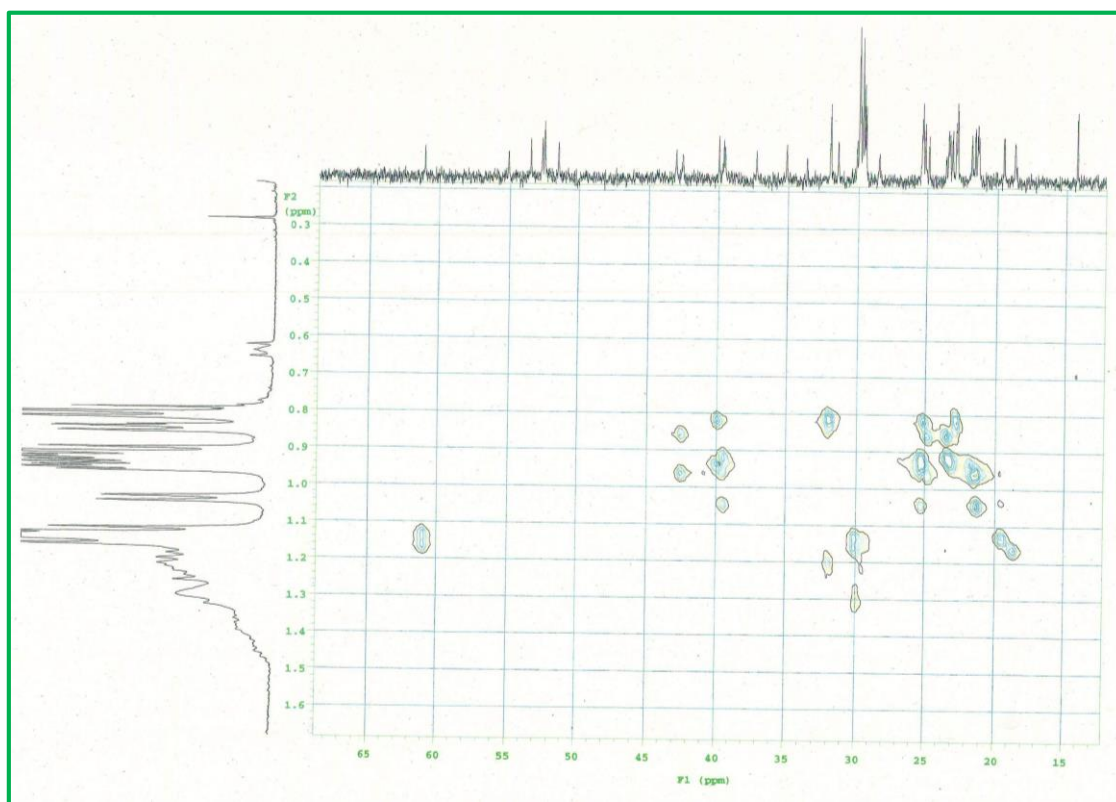

**Figure S7-c.** HMBC spectrum expansions of compound **1** (pyridine-d<sub>5</sub>)

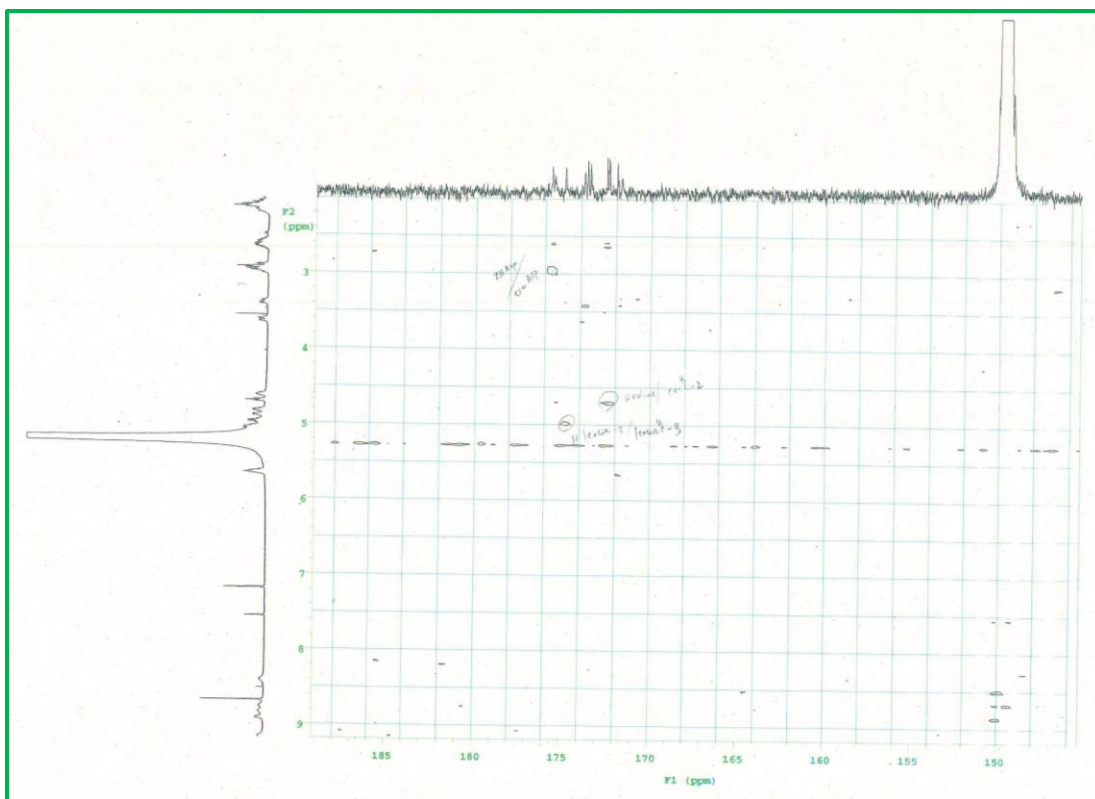

**Figure S7-d.** HMBC spectrum expansions of compound **1** (pyridine-d<sub>5</sub>)

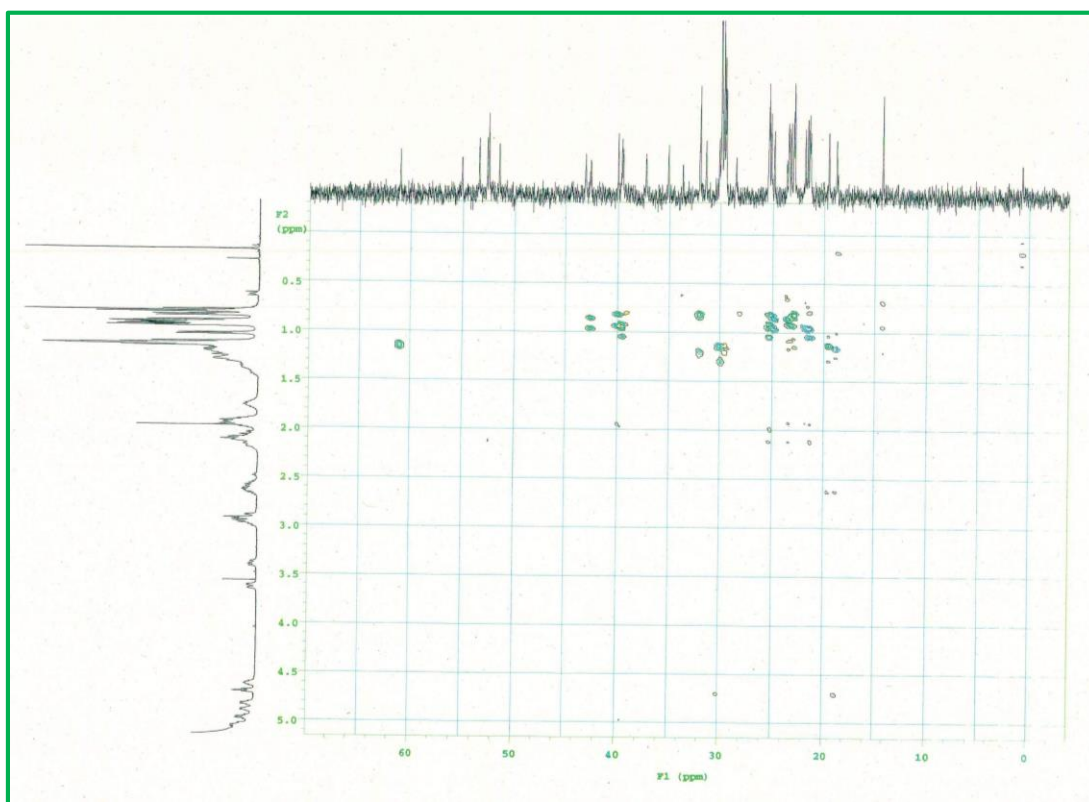

**Figure S7-e.** HMBC spectrum expansions of compound **1** (pyridine-d<sub>5</sub>)

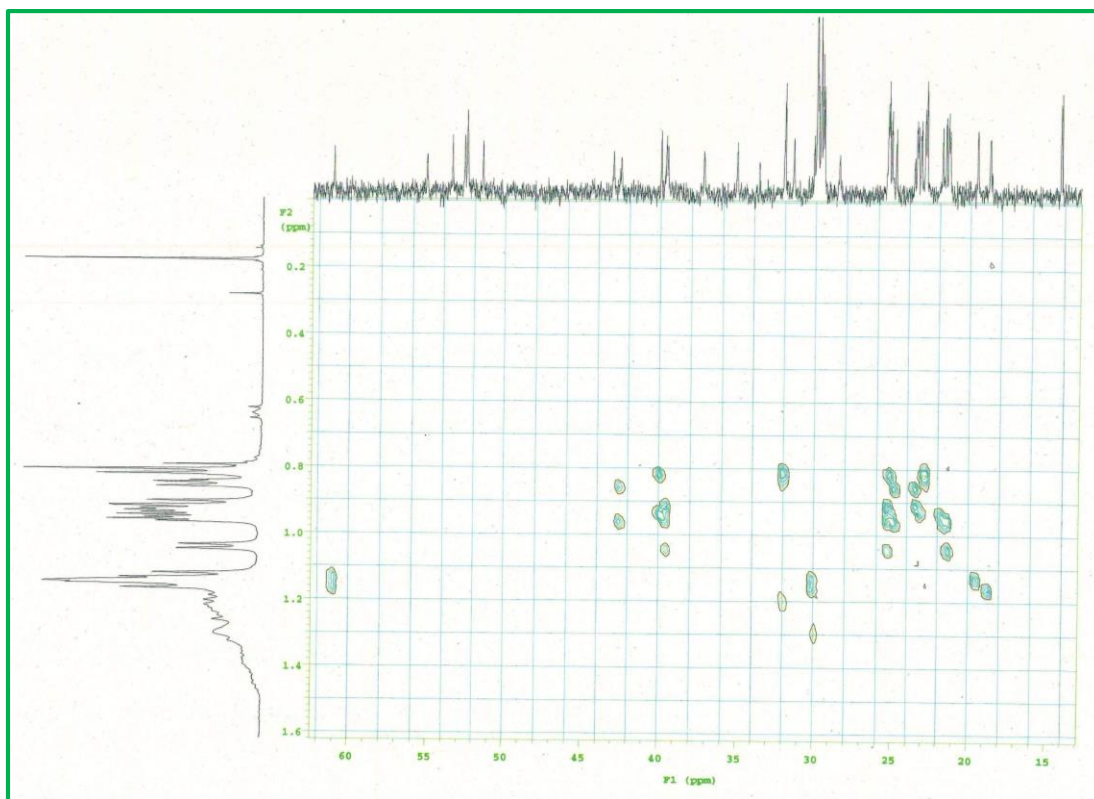

**Figure S7-f.** HMBC spectrum expansions of compound **1** (pyridine-d<sub>5</sub>)

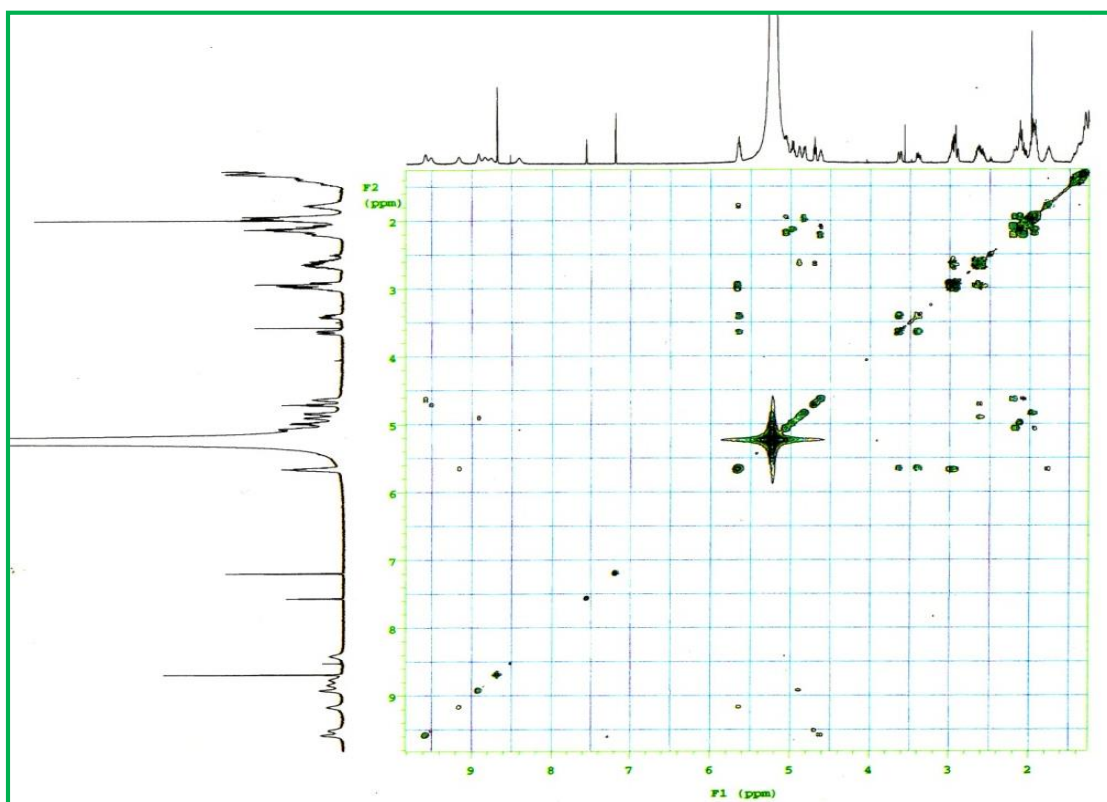

**Figure S8.** <sup>1</sup>H-<sup>1</sup>H COSY correlations of compound **1** (pyridine-d<sub>5</sub>)



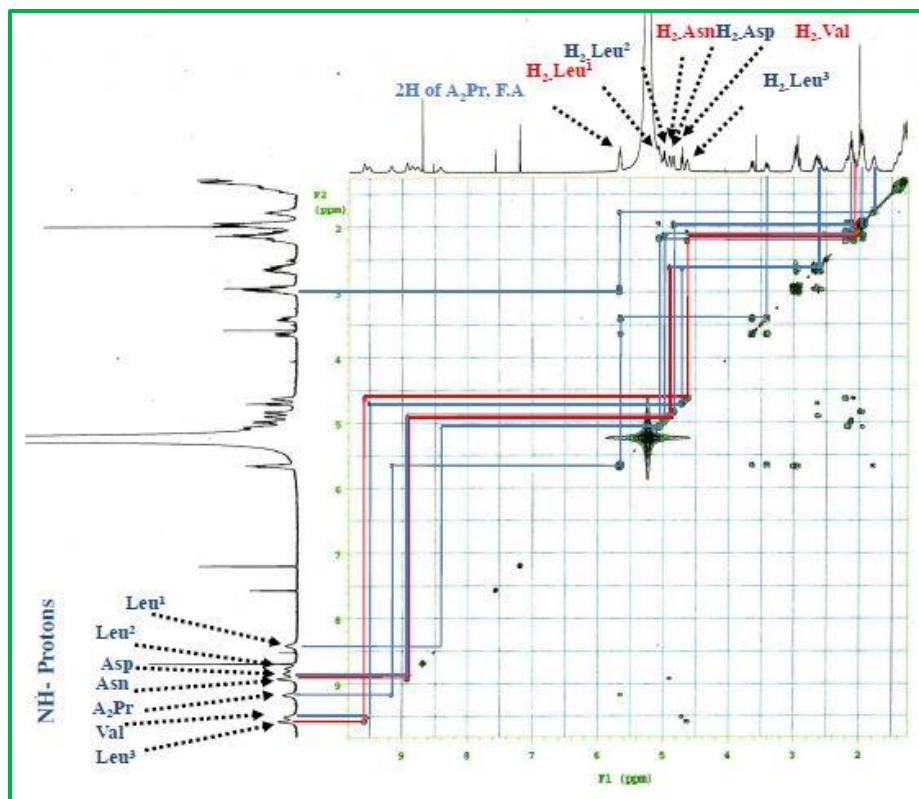

**Figure S8-a.** <sup>1</sup>H-<sup>1</sup>H COSY spectrum of compound **1** with identified correlations

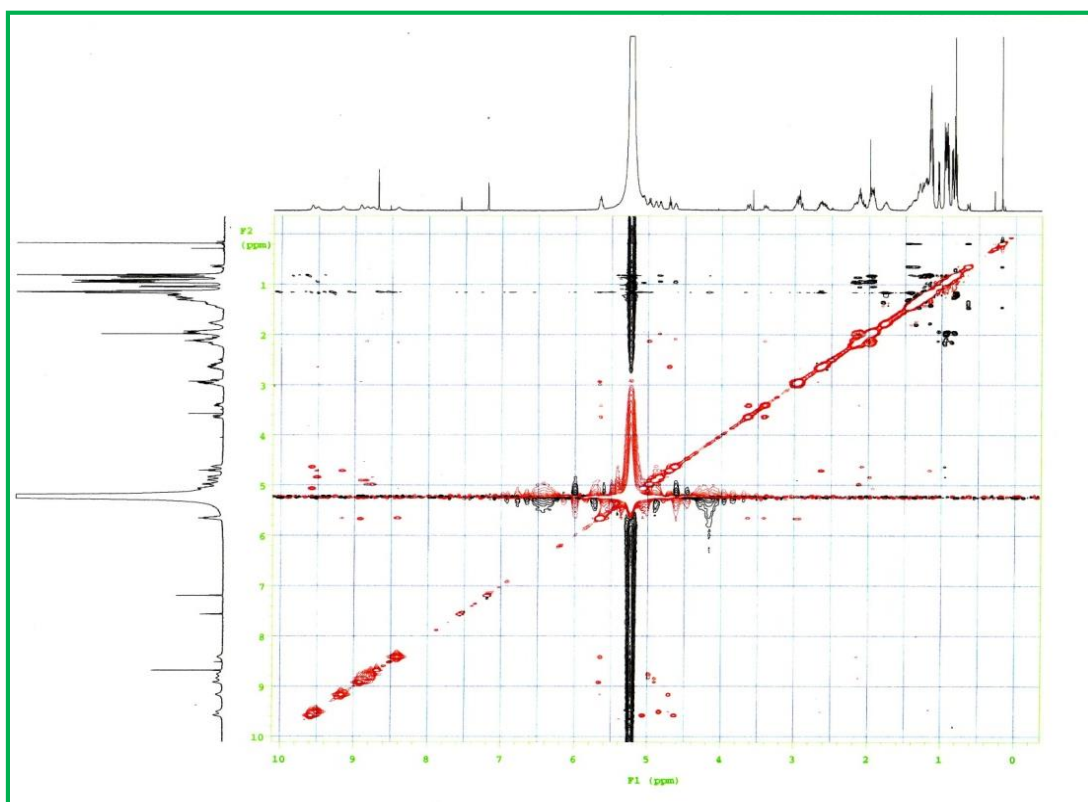

**Figure S9.** NOESY correlations of compound **1** (pyridine-d<sub>5</sub>)

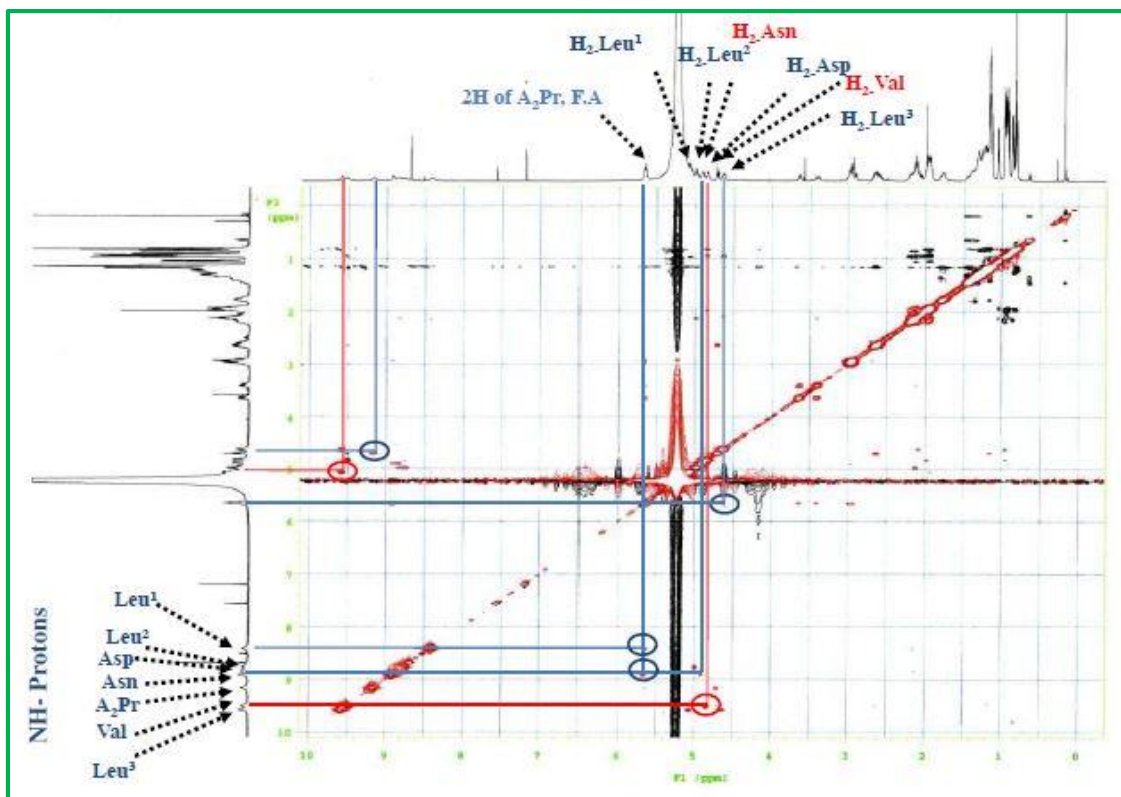

**Figure S9-a.** NOESY spectrum of compound **1** with identified correlations
